# Supplementary material for: Ligand Binding Properties of Odorant-Binding Protein OBP5 from Mus musculus
Source: MDPI journal article supplement (doi:10.3390/biology12010002), 2022-12-20
Supplement: s1 [file s1]

## Ligand binding properties of odorant-binding protein OBP5 from *Mus musculus*

Lucie Moitrier <sup>1</sup>, Christine Belloir <sup>2</sup>, Maxence Lalis <sup>3</sup>, Yanxia Hou <sup>4</sup>, Jérémie Topin <sup>5,\*</sup> and Briand Loïc <sup>6,\*</sup>

### Supplementary

```
      10      20      30      40      50      60
MRGC HHHHHH TDP AMEGPWK TVAIAADRVD KIERGGELRI YCRSLTCEKE CKEMKVTFYV
      70      80      90     100     110     120
NENGQCSLTT ITGYLQEDGK TYKTQFQGNN RYKLVDESPE NLTFYSENV D RADRKTKLLE
      130     140     150     160
ILGHGPLTSE QKEKFAELAE EKGIPAGNIR EVLITDYCPE
```

**Figure S1.** Amino acid sequence of recombinantly expressed mOBP5. The mOBP5 sequence (Ala14-Glu160) is shown with a green background. Numbers refer to amino acid residues of mOBP5 (signal peptide: 1–16). The His-Tag sequence is shown in yellow. This tag was used for purification and immunodetection of the protein.

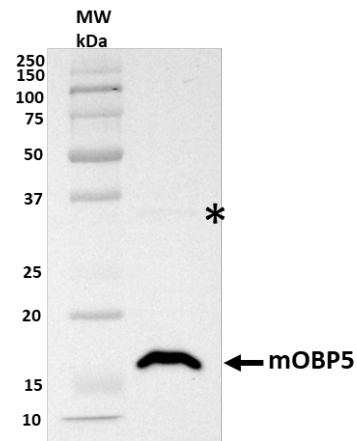

**Figure S2.** Western blot analysis of mOBP5 expressed in *E. coli* using the pQE-31 vector. The purified protein from the gel filtration was separated by SDS-PAGE followed by western blotting using mouse anti-IHS primary antibody and goat anti-mouse horseradish peroxidase-conjugated secondary antibody. The arrow indicates position of purified mOBP5. The asterisk indicates a band probably corresponding to a SDS-resistant dimer of mOBP5.

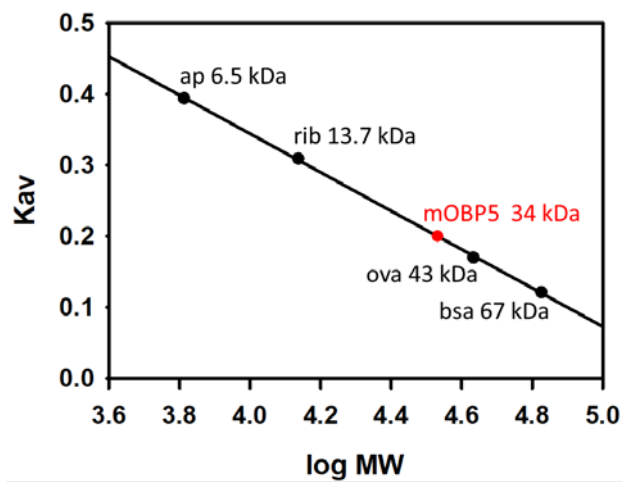

**Figure S3S2:** Calibration curve used to estimate the native molecular weight of purified mOBP5. The calibration curve for the Superdex 75 column (GE Healthcare) was established with bovine serum albumine (bsa, 67 kDa), ovalbumin (ova, 43 kDa), carbonic ribonuclease (rib, 13.7 kDa) and aprotinin (ap, 6.5 kDa). The estimated molecular mass of mOBP5 is 34 kDa.

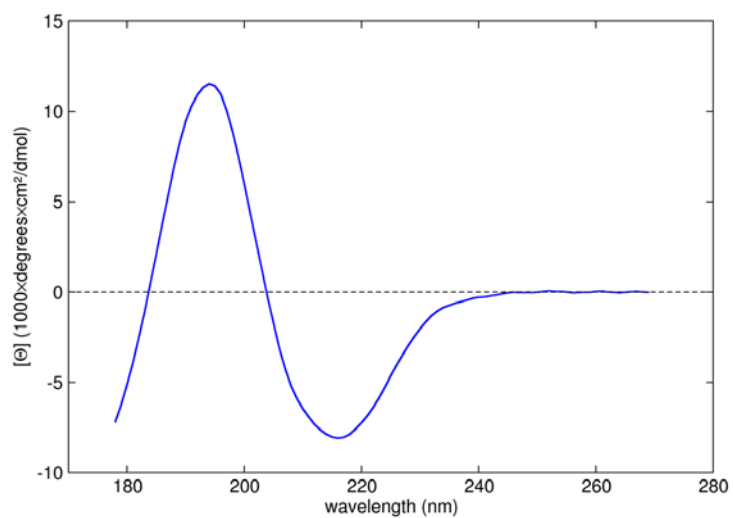

**Figure S4S3:** Predicted circular dichroism spectrum of mOBP5 using SESCA software.

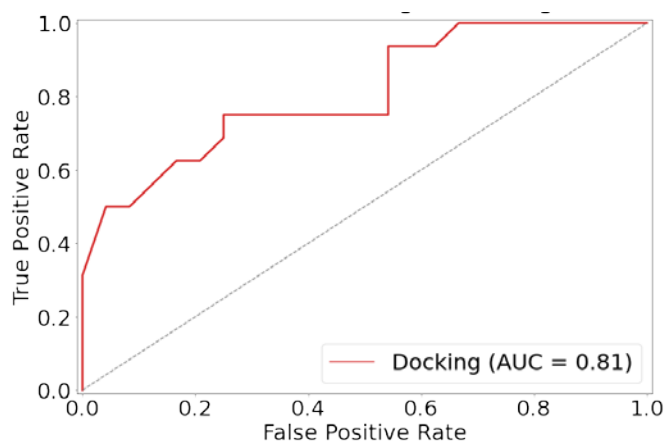

**Figure S554:** Receiver Operating Characteristic curve (ROC), characterizing the protocols' efficacy using the binding energy score from Autodock Vina. It depicts the True positive rate (sensitivity) versus false positive rate (1 - specificity). AUC corresponds to the area under the curve. The closer the AUC gets to 1 the better the protocol is at discriminating binders and non-binders.

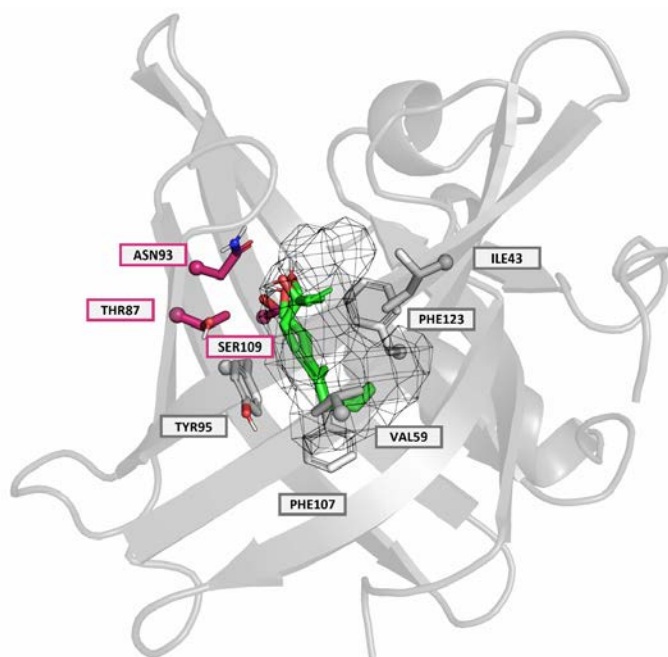

**Figure S655:** Binding pocket residues of mOBP5, polar and apolar residues are coloured in purple and grey respectively. For each amino acid, only the side chain is represented, and the carbon alpha appears as a sphere. Each amino acids are depicted with a 3-letter code and their position in the sequence. Predicted mOBP5 internal cavity is represented as a black mesh grid. Heptanol, Octanol and Geraniol with their best predicted pose are represented in green.

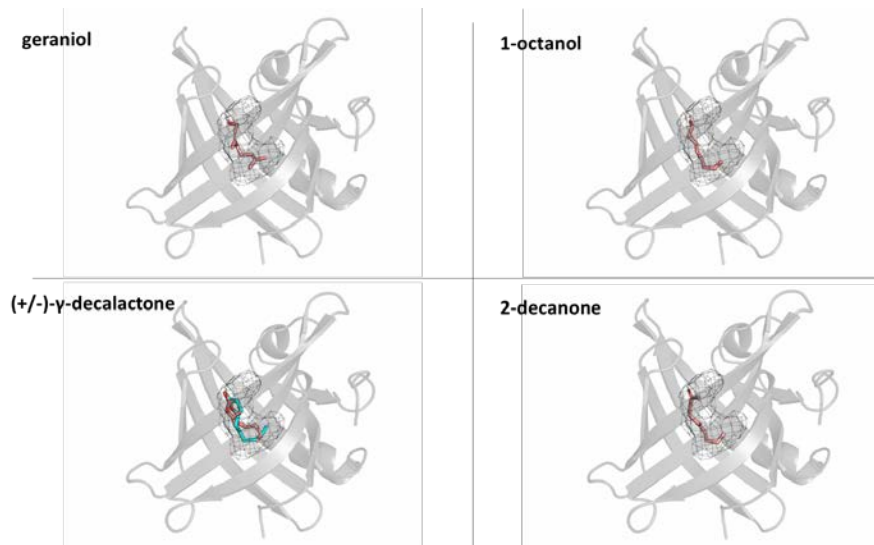

**Figure S7S6:** Representation of the best pose found through docking experiments of 4 molecules (geraniol, octanol, (+/-)- $\gamma$ -decalactone and 2-decanone). Odorants are represented in orange and the calyx as blue mesh grid. The two  $\gamma$ -decalactone enantiomers are superimposed and show a similar binding pose.

**Table S1:** IC<sub>50</sub> values and affinity constants for the odorants used for mOBP5. For very weak ligands, if an IC<sub>50</sub> value could not be extrapolated, an arbitrary value of 200 µM was assigned.

|                                       | IC <sub>50</sub> (µM) <sup>Fluo.a</sup> | K <sub>d</sub> (µM) <sup>Fluo.b</sup> | N <sup>ITC.c</sup> | K <sub>a</sub> (ITC) <sup>ITC.d</sup> | 1/(K <sub>a</sub> -K <sub>d</sub> ) (µM) <sup>ITC.e</sup> |
|---------------------------------------|-----------------------------------------|---------------------------------------|--------------------|---------------------------------------|-----------------------------------------------------------|
| hexanoic acid                         | 200.00                                  | ≥3.16                                 |                    |                                       |                                                           |
| octanoic acid                         | 200.00                                  | ≥3.16                                 |                    |                                       |                                                           |
| 1-hexanol                             | 40.0                                    | 2.60                                  |                    |                                       |                                                           |
| 1-heptanol                            | 2.4                                     | 0.59                                  |                    |                                       |                                                           |
| 1-octanol                             | 1.1                                     | 0.29                                  | 0.71               | 3.6E+07                               | 0.028                                                     |
| thymol                                | 40.0                                    | 2.60                                  |                    |                                       |                                                           |
| geraniol                              | 0.7                                     | 0.19                                  | 0.71               | 2.5E+07                               | 0.040                                                     |
| linalool                              | 1.1                                     | 0.30                                  |                    |                                       |                                                           |
| menthol                               | 1.5                                     | 0.38                                  |                    |                                       |                                                           |
| hexanal                               | 200.0                                   | ≥3.16                                 |                    |                                       |                                                           |
| benzaldehyde                          | 200.0                                   | ≥3.16                                 |                    |                                       |                                                           |
| 4-methoxy-benzaldehyde                | 40.0                                    | 2.60                                  |                    |                                       |                                                           |
| isovanillin                           | 200.0                                   | ≥3.16                                 |                    |                                       |                                                           |
| vanillin                              | 200.0                                   | ≥3.16                                 |                    |                                       |                                                           |
| octanal                               | 1.3                                     | 0.34                                  |                    |                                       |                                                           |
| cinnamal                              | 200.0                                   | ≥3.16                                 |                    |                                       |                                                           |
| citral                                | 2.5                                     | 0.61                                  | 0.65               | 1.3E+07                               | 0.076                                                     |
| lilialdehyde                          | 1.4                                     | 0.38                                  |                    |                                       |                                                           |
| pyrazine                              | 200.0                                   | ≥3.16                                 |                    |                                       |                                                           |
| 2-methyl-pyrazine                     | 200.0                                   | ≥3.16                                 |                    |                                       |                                                           |
| 2-ethyl-pyrazine                      | 200.0                                   | ≥3.16                                 |                    |                                       |                                                           |
| 3-iso-butyl-2-methoxy-pyrazine (IBMP) | 7.2                                     | 1.30                                  |                    |                                       |                                                           |
| maltol                                | 200.0                                   | ≥3.16                                 |                    |                                       |                                                           |
| cyclohexanone                         | 200.0                                   | ≥3.16                                 |                    |                                       |                                                           |
| (-)-carvone                           | 1.1                                     | 0.28                                  |                    |                                       |                                                           |
| (+)-carvone                           | 1.0                                     | 0.28                                  | 0.47               | 8.7E+06                               | 0.115                                                     |
| camphor                               | 10.4                                    | 1.60                                  |                    |                                       |                                                           |
| menthone                              | 0.8                                     | 0.23                                  | 0.58               | 1.8E+07                               | 0.055                                                     |
| 2-decanone                            | 1.2                                     | 0.31                                  |                    |                                       |                                                           |
| β-ionone                              | 3.0                                     | 0.71                                  |                    |                                       |                                                           |
| ethyl acetate                         | 200.0                                   | ≥3.16                                 |                    |                                       |                                                           |
| ethyl butyrate                        | 40.0                                    | 2.60                                  |                    |                                       |                                                           |
| isoamyl acetate                       | 2.5                                     | 0.60                                  | 0.87               | 8.6E+06                               | 0.116                                                     |
| anisole                               | 200.0                                   | ≥3.16                                 |                    |                                       |                                                           |
| cineole                               | 40.0                                    | 2.60                                  |                    |                                       |                                                           |
| γ-decalactone                         | 2.4                                     | 0.58                                  |                    |                                       |                                                           |
| α-pinene                              | 0.9                                     | 0.24                                  |                    |                                       |                                                           |
| eugenol                               | 200.0                                   | ≥3.16                                 |                    |                                       |                                                           |
| dimethyl disulfide                    | 200.0                                   | ≥3.16                                 |                    |                                       |                                                           |
| benzothiazole                         | 200.0                                   | ≥3.16                                 |                    |                                       |                                                           |

<sup>a</sup>IC<sub>50</sub> (μM)<sup>Fluo</sup>: concentrations of the competitor ligand that caused a decrease of the NPN fluorescence of half-maximal intensity; <sup>b</sup>K<sub>d</sub> (μM)<sup>Fluo</sup>: dissociation constant determined by fluorescence; <sup>c</sup>N<sup>ITC</sup>: binding stoichiometry per monomer determined by ITC; <sup>d</sup>K<sub>a</sub> (ITC)<sup>ITC</sup>: association constant determined by ITC; <sup>e</sup>K<sub>d</sub> (μM)<sup>ITC</sup>: dissociation constant determined by ITC.

Table S2: Volume values and polarity score according to fpocket.

| Name         | PDB code | Volume (Å <sup>3</sup> ) | Polarity_Score |
|--------------|----------|--------------------------|----------------|
| Panda OBP3   | 5NGH     | 486                      | 3              |
| Pig OBP      | 1A3Y     | 502                      | 5              |
| Human OBPIIa | 4RUN     | 931                      | 11             |
| Bovine OBP   | 1OBP     | 457                      | 5              |
| Rat OBP3     | 3ZQ3     | 299                      | 3              |
| Rat OBP1     | 3FIQ     | 401                      | 4              |
| Mouse OBP5   | -        | 437                      | 4              |

Formatted: Superscript

Formatted: English (United States)

Formatted: Font: (Default) Calibri, Not Superscript/ Subscript

Formatted: English (United States)

Formatted: Font: (Default) Calibri

Formatted: English (United States)

Formatted: Font: (Default) Calibri, Not Superscript/ Subscript

Formatted: Font: (Default) Calibri

Formatted: English (United States)

Formatted: English (United States), Not Superscript/ Subscript

Formatted: English (United States)

Formatted: Superscript

Formatted: English (United States)

Formatted: Superscript

Formatted: English (United States)

Formatted: Font: (Default) Calibri
